# Supplementary material for: Domain topology of human Rasal
Source: publisher site journal article supplement (doi:10.1515/hsz-2017-0159), 2017-09-08
Supplement: Supplementary file 1 [file hsz-2017-0159_suppl.pdf]

## Supplementary Figures

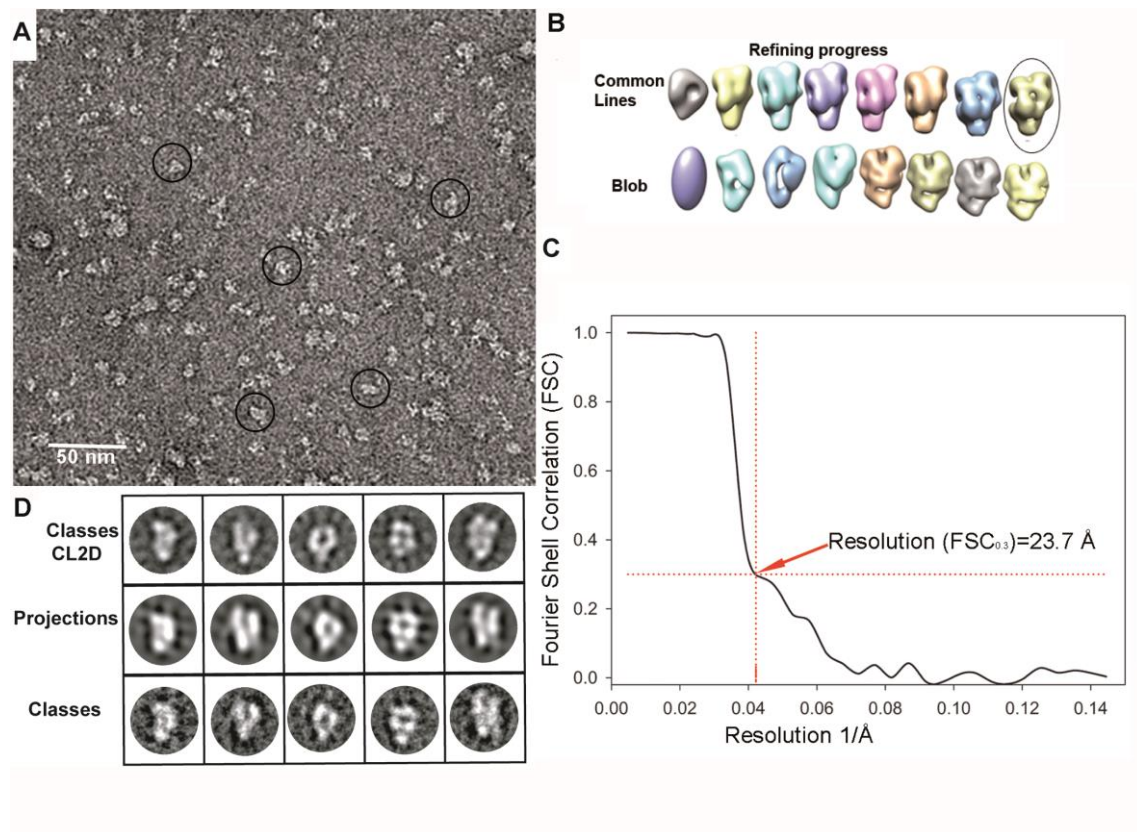

### Supplementary Figure S1. Negative staining EM analysis of Rasal

(A) Example of a negative staining EM image of Rasal. Selected individual particles are circled. Bar, 50 nm. (B) Representation of the iterative angular refinement for 3D reconstruction of Rasal. The refinement was performed simultaneously using EMAN, starting from two initial models, blob and common lines. The final model used for subsequent refinement by Projection Matching is circled. (C) Computed FSC curve for the Rasal Projection Matching final reconstruction. Resolution was estimated to be 23 Å based on the 0.3 criterion. (D) The 3D reconstruction quality can be assessed by comparison of the reference-free 2D classes (CL2D, top row) with the 3D map projections and the generated class averages from EMAN (center and bottom, respectively), based on the 3D reconstruction of Rasal.

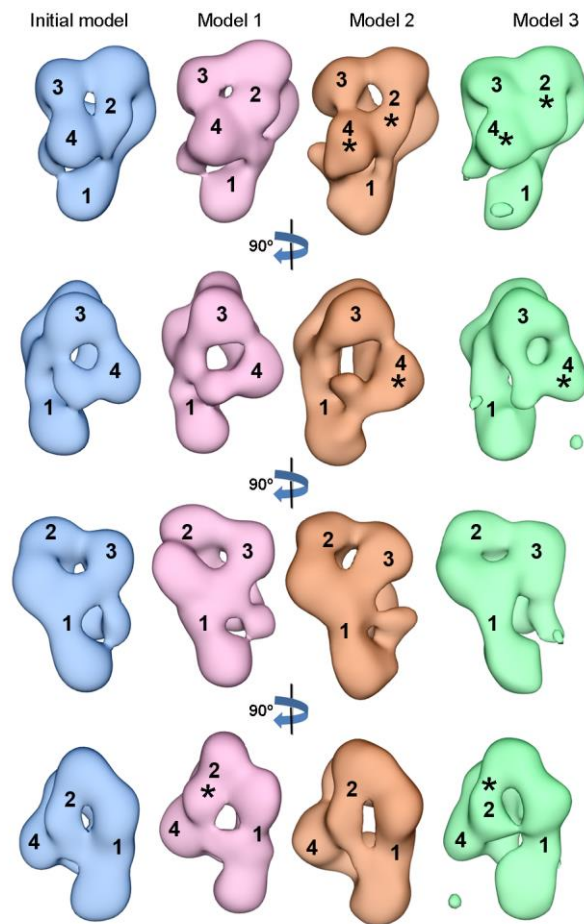

**Supplementary Figure S2. Rasal flexibility.** Four orthogonal views (vertical) of the Rasal 3D reconstruction obtained with EMAN (initial model), and the three volumes obtained from the 3D classification procedure (ML3D). From the whole set of particles, 40% are assigned to Model 1, 25% to model 2 and 35% to model 3. Asterisks indicate the regions with the highest conformational flexibility.

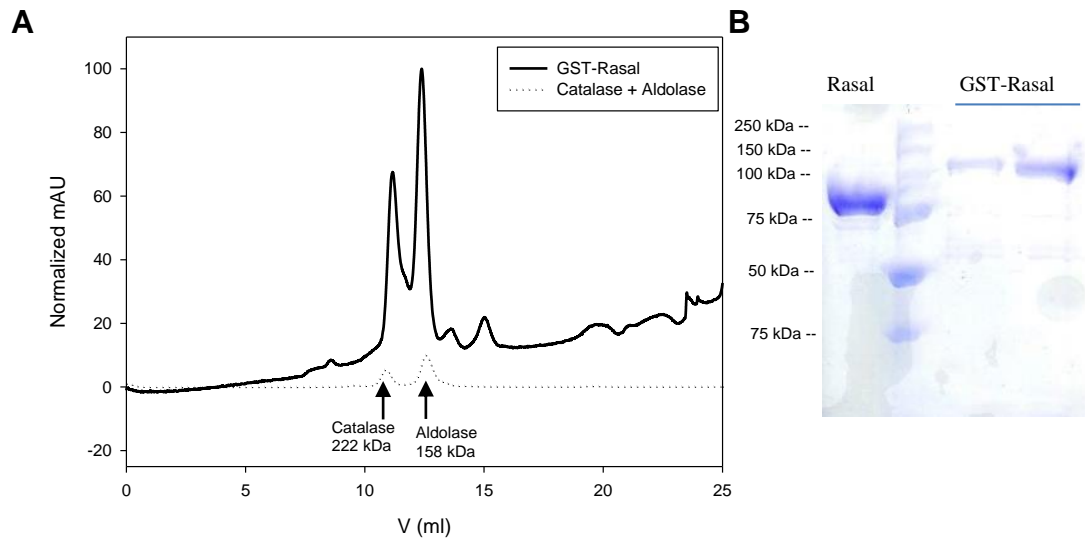

### Supplementary Figure S3. GST-Rasal characterization

(A) Size exclusion chromatography, using Superdex-200 10/300 GL, of the GST-Rasal sample. Catalase and aldolase were used as molecular weight standards. GST-Rasal eluted in two peaks, corresponding to dimer (240 kDa) and monomer (120 kDa). (B) Two fractions of eluted GST-Rasal were resolved by SDS-PAGE. Rasal and molecular weight markers are shown.

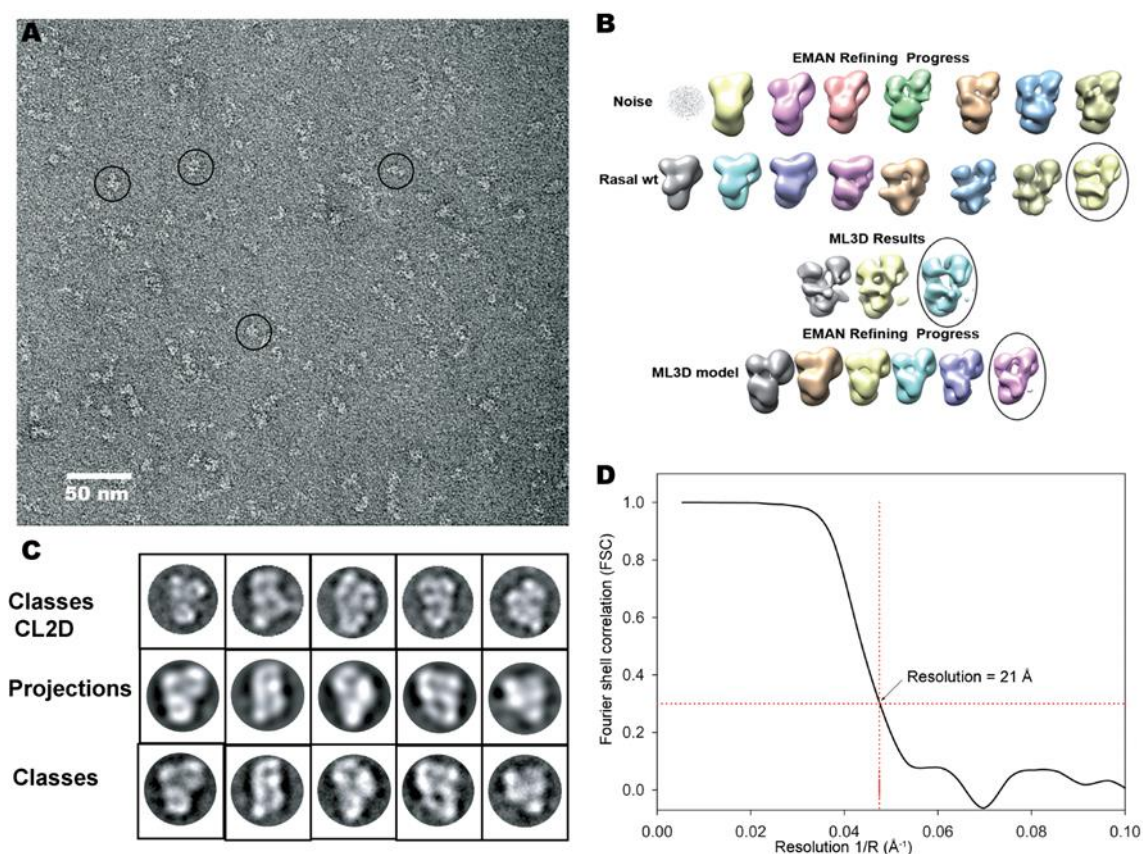

#### Supplementary Figure S4. Negative staining EM analysis of GST-Rasal

(A) Example of a negative staining EM image of GST-Rasal. Selected individual particles are circled. Bar 50 nm. (B) Representation of the iterative angular refinement for 3D reconstruction of GST-Rasal. The refinement was performed simultaneously using EMAN, starting from two initial models, noise and low resolution-filtered Rasal. The final model using Rasal as initial model (circled) was used as an initial model for ML3D classification. The most consistent volume obtained in ML3D (circled) was filtered and refined using EMAN. The final model is circled. (C) The 3D reconstruction quality can be assessed by comparison of the reference-free 2D classes (CL2D, top row) with the 3D map projections and the generated class averages from EMAN (center and bottom, respectively), based on the 3D reconstruction of GST-Rasal. (D) Computed FSC curve for the GST-Rasal final volume. Resolution was estimated to be 21 Å based on the 0.3 criterion.

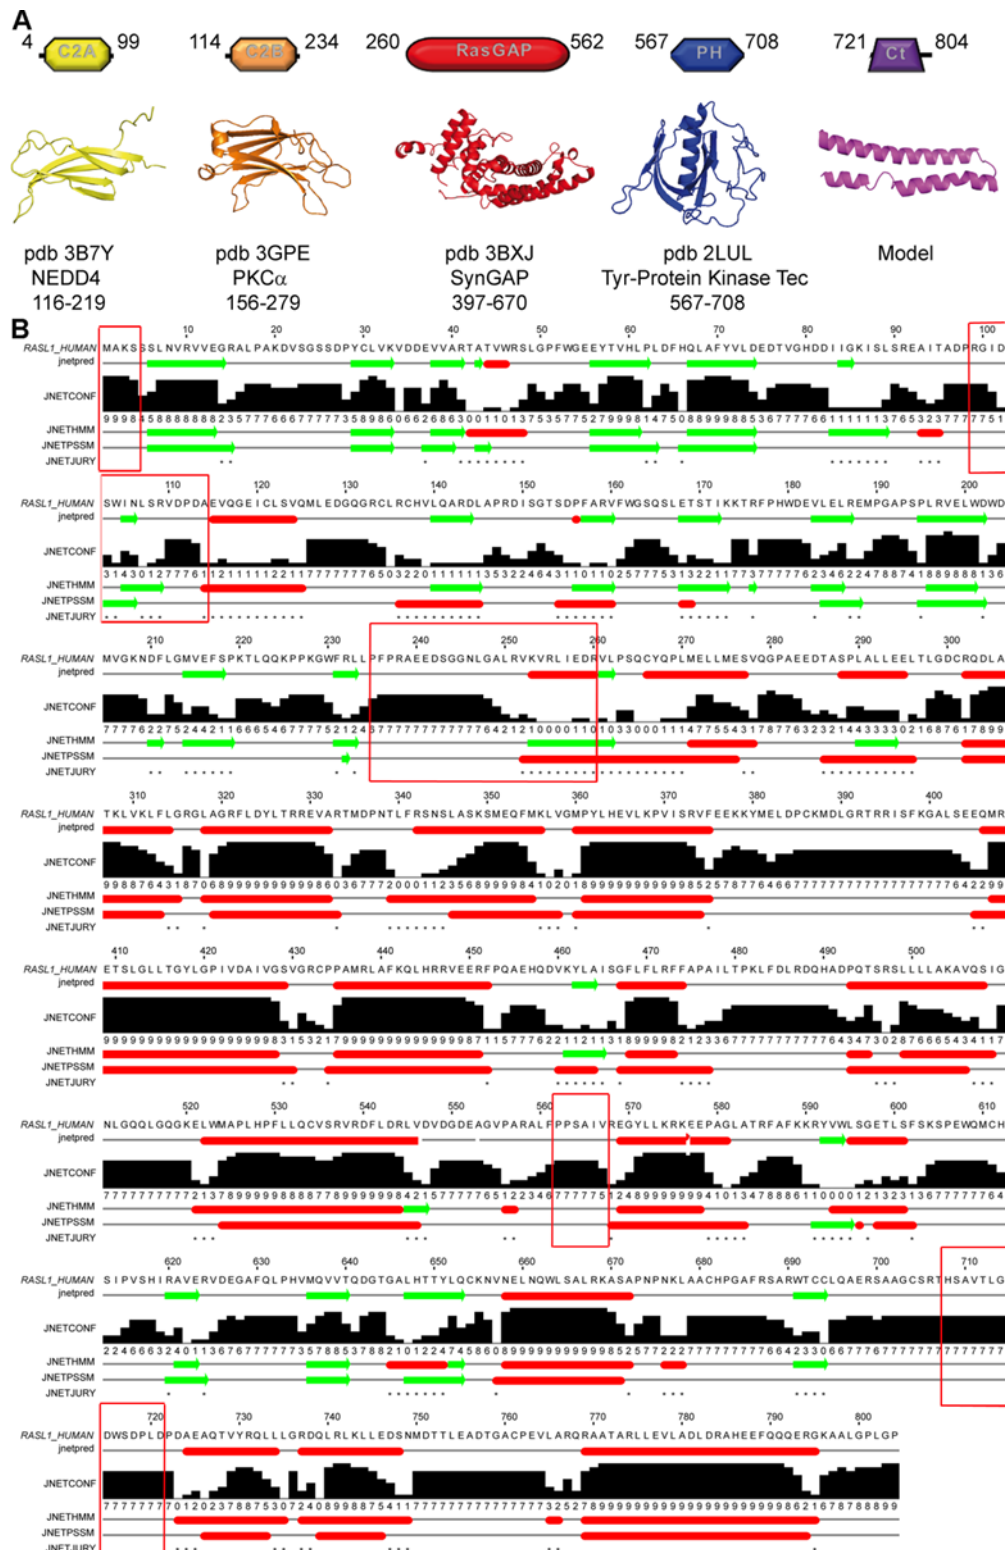

**Supplementary Figure S5. Rasal sequence homology and structure prediction**

(A) 3D structures of homologous domains used for docking into the Rasal and GST-Rasal 3D reconstructions. (B) JNET secondary structure prediction for Rasal. Links between domains, not present in 3D structures, are labeled with red rectangles.

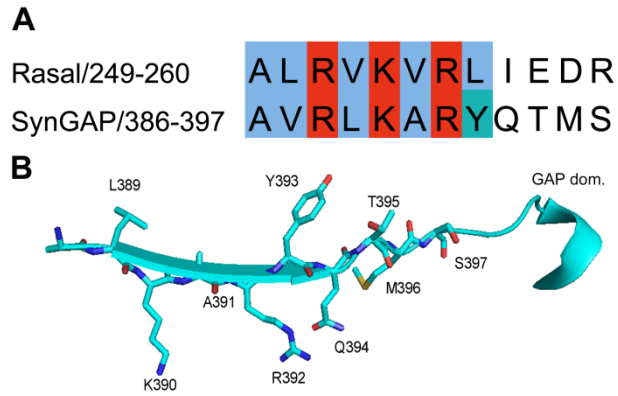

**Supplementary Figure S6. Rasal and SynGAP sequence alignment**

(A) Sequence alignment of Rasal and SynGAP residues preceding the GAP domain, using the Clustal X color scheme. (B) SynGAP x-ray structure of this region. The residues with high homology correspond to a  $\beta$ -sheet preceding the GAP domain.



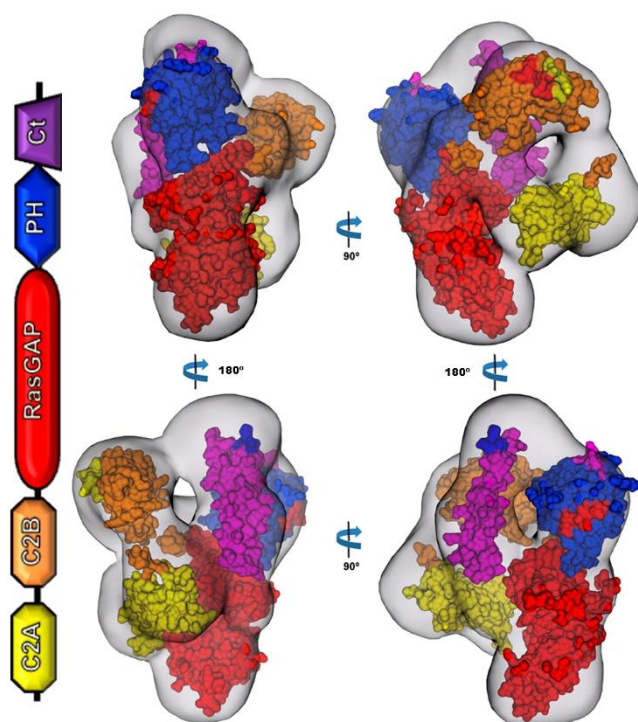

**Supplementary Figure S7. Rasal domain topology**

Four views of homologous 3D structures of the distinct domains and the Ct 3D model, represented as surface models, docked into the Rasal 3D reconstruction.

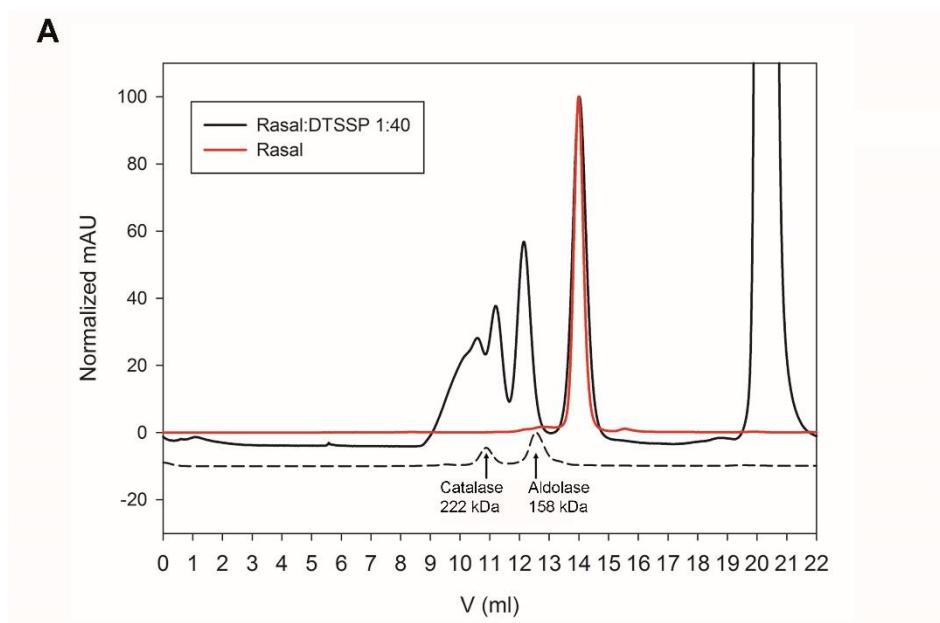

**Supplementary Figure S8. Size exclusion chromatography of Rasal and DTSSP-crosslinked Rasal** (1:40 Rasal:DTSSP molar ratio). Elution profiles of catalase and aldolase are shown as molecular weight standards. Non-crosslinked Rasal eluted as a single peak at a size <158 kDa, in accordance with its monomeric structure. Crosslinked Rasal eluted in 3 peaks, a main peak that overlapped with non-crosslinked Rasal, and two high molecular weight peaks possibly due to non-specific DTSSP-driven oligomerization or stabilization of unstable oligomers. Fractions of the peak corresponding to the monomer were digested and analyzed by mass spectrometry.



**Supplementary Table S1. Detailed information of crosslinked peptides identified at false discovery rate (FDR) = 0.0.** Nineteen Inter-domain crosslinked peptides; twelve intra-domain crosslinked peptides. Five dimeric crosslinked peptides.

| Score | m/z       | M+H+       | Peptide 1        | From | To  | Peptide2                     | From | To  | Domains       | Res1 | Res2 | FDR |
|-------|-----------|------------|------------------|------|-----|------------------------------|------|-----|---------------|------|------|-----|
| 199   | 487.75516 | 1947.99881 | [SSSLNVR]        | 4    | 10  | [LAFKQLHR]                   | 439  | 446 | C2A-GAP       | 4    | 442  | 0   |
| 185   | 479.58363 | 1436.73634 | [VKVR]           | 252  | 255 | [SSSLNVR]                    | 4    | 10  | C2A-GAP       | 253  | 4    | 0   |
| 198   | 908.45861 | 1815.90994 | [SSSLNVR]        | 4    | 10  | [GKAALGPLGP}                 | 795  | 805 | C2A-Ct        | 4    | 796  | 0   |
| 142   | 605.30368 | 1813.89649 | [SSSLNVR]        | 4    | 10  | [EGYLLKR]                    | 569  | 575 | C2A-PH        | 4    | 574  | 0   |
| 183   | 597.06425 | 2385.23517 | [VKVR]           | 252  | 255 | [VFWGSQSLETSTIKK]            | 160  | 174 | C2B-GAP       | 253  | 173  | 0   |
| 167   | 540.79546 | 2160.16001 | [VKVR]           | 252  | 255 | [TLQQKPPKGWFR]               | 221  | 232 | C2B-GAP       | 253  | 228  | 0   |
| 160   | 500.86548 | 2500.29829 | [VKVR]           | 252  | 255 | [KTRFPHWDEVLELR]             | 174  | 187 | C2B-GAP       | 253  | 174  | 0   |
| 147   | 718.1457  | 3586.69939 | [SNSLASKSMEQFMK] | 343  | 356 | [KTRFPHWDEVLELR]             | 174  | 187 | C2B-GAP       | 348  | 174  | 0   |
| 196   | 565.04586 | 2257.16161 | [LAFKQLHR]       | 439  | 446 | [KEEPAGLATR]                 | 576  | 585 | GAP-PH        | 442  | 576  | 0   |
| 189   | 437.23119 | 1745.90293 | [VKVR]           | 252  | 255 | [KEEPAGLATR]                 | 576  | 585 | GAP-PH        | 253  | 576  | 0   |
| 148   | 400.9629  | 1600.82977 | [VKVR]           | 252  | 255 | [KASAPNPKN]                  | 669  | 677 | GAP-PH        | 253  | 669  | 0   |
| 145   | 639.94179 | 3195.67984 | [KEEPAGLATR]     | 576  | 585 | [LVGMPYLHEVLKPVISR]          | 357  | 373 | GAP-PH        | 576  | 368  | 0   |
| 143   | 708.83436 | 2832.31561 | [KEEPAGLATR]     | 576  | 585 | [SNSLASKSMEQFMK]             | 343  | 356 | GAP-PH        | 576  | 348  | 0   |
| 139   | 516.77974 | 2064.09713 | [EGYLLKR]        | 569  | 575 | [LAFKQLHR]                   | 439  | 446 | GAP-PH        | 574  | 442  | 0   |
| 184   | 518.95564 | 1554.85237 | [VKVR]           | 252  | 255 | [GKAALGPLGP}                 | 795  | 805 | GAP -Ct       | 253  | 796  | 0   |
| 167   | 881.08849 | 2641.25092 | [GKAALGPLGP}     | 795  | 805 | [SNSLASKSMEQFMK]             | 343  | 356 | GAP -Ct       | 796  | 348  | 0   |
| 147   | 751.91196 | 3004.62601 | [GKAALGPLGP}     | 795  | 805 | [LVGMPYLHEVLKPVISR]          | 357  | 373 | GAP -Ct       | 796  | 368  | 0   |
| 196   | 709.03227 | 2125.08226 | [GKAALGPLGP}     | 795  | 805 | [KEEPAGLATR]                 | 576  | 585 | PH-Ct         | 796  | 576  | 0   |
| 135   | 644.67505 | 1932.0106  | [EGYLLKR]        | 569  | 575 | [GKAALGPLGP}                 | 795  | 805 | PH-Ct         | 574  | 796  | 0   |
| 221   | 579.7899  | 2316.13777 | [KEEPAGLATR]     | 576  | 585 | [KEEPAGLATR]                 | 576  | 585 | Dimer PH-PH   | 576  | 576  | 0   |
| 201   | 837.8754  | 3348.47977 | [SNSLASKSMEQFMK] | 343  | 356 | [SNSLASKSMEQFMK]             | 343  | 356 | Dimer GAP-GAP | 349  | 349  | 0   |
| 188   | 440.44456 | 2198.19369 | [LAFKQLHR]       | 439  | 446 | [LAFKQLHR]                   | 439  | 446 | Dimer GAP-GAP | 442  | 442  | 0   |
| 151   | 967.51677 | 1934.02626 | [GKAALGPLGP}     | 795  | 805 | [GKAALGPLGP}                 | 795  | 805 | Dimer Ct-Ct   | 796  | 796  | 0   |
| 144   | 392.56374 | 1175.67667 | [VKVR]           | 252  | 255 | [VKVR]                       | 252  | 255 | Dimer GAP-GAP | 253  | 253  | 0   |
| 200   | 723.21669 | 4334.26376 | [LAFKQLHR]       | 439  | 446 | [RVEERFPQAEHQDVKYLAISGFLFLR] | 447  | 472 | GAP-GAP       | 442  | 461  | 0   |
| 197   | 568.2943  | 2837.44239 | [LAFKQLHR]       | 439  | 446 | [RISFKGALSEEQMR]             | 395  | 408 | GAP-GAP       | 442  | 399  | 0   |

|     |           |            |                  |     |     |                             |     |     |         |     |     |   |
|-----|-----------|------------|------------------|-----|-----|-----------------------------|-----|-----|---------|-----|-----|---|
| 187 | 422.48877 | 1686.93325 | [VKVR]           | 252 | 255 | [LAFKQLHR]                  | 439 | 446 | GAP-GAP | 253 | 442 | 0 |
| 184 | 582.30363 | 2326.19269 | [VKVR]           | 252 | 255 | [RISFKGALSEEQMR]            | 395 | 408 | GAP-GAP | 253 | 399 | 0 |
| 181 | 587.72625 | 2934.60214 | [LAFKQLHR]       | 439 | 446 | [FFAPAILTPKLFDLR]           | 473 | 487 | GAP-GAP | 442 | 482 | 0 |
| 168 | 525.89605 | 2625.45114 | [VKVR]           | 252 | 255 | [LVGMPYLHEVLKPVISR]         | 357 | 373 | GAP-GAP | 253 | 368 | 0 |
| 164 | 523.62487 | 3136.71284 | [LAFKQLHR]       | 439 | 446 | [LVGMPYLHEVLKPVISR]         | 357 | 373 | GAP-GAP | 442 | 368 | 0 |
| 160 | 743.17626 | 3711.85219 | [SNSLASKSMEQFMK] | 343 | 356 | [LVGMPYLHEVLKPVISR]         | 357 | 373 | GAP-GAP | 348 | 368 | 0 |
| 160 | 679.19007 | 4070.10404 | [LAFKQLHR]       | 439 | 446 | [FFAPAILTPKLFDLRDQHADPQTSR] | 473 | 497 | GAP-GAP | 442 | 482 | 0 |
| 152 | 593.98086 | 3558.84878 | [VKVR]           | 252 | 255 | [FFAPAILTPKLFDLRDQHADPQTSR] | 473 | 497 | GAP-GAP | 253 | 482 | 0 |
| 143 | 566.27547 | 2262.08005 | [VKVR]           | 252 | 255 | [SNSLASKSMEQFMK]            | 343 | 356 | GAP-GAP | 253 | 349 | 0 |
| 136 | 724.778   | 3619.86089 | [ISFKGALSEEQMR]  | 396 | 408 | [LVGMPYLHEVLKPVISR]         | 357 | 373 | GAP-GAP | 297 | 368 | 0 |

## **Supplementary Methods**

### **DTSSP crosslinking assays**

Rasal at 40  $\mu$ M was incubated with 1.6 mM DTSSP (Thermo Scientific) for 30 min. Then, 50 mM Tris was added to stop the crosslinking reaction. The crosslinked Rasal was purified by SEC using Superdex 200 10/300 increase resin. Fractions of the monomer peak were pooled for the XL-MS experiments.

### **Trypsin digestion, LC-MS/MS analysis and peptide identification**

Purified crosslinked Rasal was precipitated using the methanol/chloroform method and the protein pellet was dissolved in 10  $\mu$ l 8 M urea, 25 mM ammonium bicarbonate. After vigorous vortexing, the urea concentration was reduced to 2 M by addition of 30  $\mu$ l of 25 mM ammonium bicarbonate, followed by 100 ng trypsin (proteomics grade; Sigma-Aldrich); digestion was allowed to proceed at 37 °C for 5 h. The resulting peptide mixture was speed-vac dried and redissolved in 0.1% formic acid.

For LC-MS/MS analysis, we used a nano-LC Ultra HPLC (Eksigent) coupled online with a 5600 triple TOF mass spectrometer through a nanospray III ion source (both from AB Sciex) equipped with a fused silica PicoTip emitter (10  $\mu$ m  $\times$  12 cm; New Objective). The HPLC setup included an Acclaim PepMap 100 trapping column (100  $\mu$ m  $\times$  2 cm, 5  $\mu$ m particle size; Thermo Scientific) and an Acquity UPLC BEH C18 column (75  $\mu$ m  $\times$  150 mm, 1.7  $\mu$ m particle size; Waters). Solvents A and B were 0.1% formic acid in water and 0.1% formic acid in acetonitrile, respectively. Peptides were fractionated at a 250 nl/min flow rate at 40 °C in gradient elution conditions consisting of 2% solvent B for 1 min, a linear increase to 30% B in 109 min, a linear increase to 40% B in 10 min, a linear increase to 90% B in 5 min and 90% B for

5 min. The ion source was operated in positive ionization mode at 150 °C with a potential difference of 2300 V. Each acquisition cycle included a survey scan (350–1250 m/z) of 250 ms and a maximum of 25 MS<sup>2</sup> spectra (100–1500 m/z).

For peptide identification, PeakView 1.2 (AB Sciex) was used to convert raw MS/MS data to an mgf file that was searched against a custom-made database containing the sequence of human Rasal. The MS/MS ion search was performed using StavroX 3.5.1 with the following settings: trypsin as enzyme allowing 2 and 3 missed cleavages for Arg and Lys residues, respectively, oxidation of Met as variable modification, DSP/DTSSP as crosslinker, and MS and MS/MS tolerances of 20 ppm. Peptide identifications were filtered at a FDR=0, corresponding to a score  $\geq 135$ .
